# Supplementary material for: Impact of Warming on Greenhouse Gas Production and Microbial Diversity in Anoxic Peat From a Sphagnum-Dominated Bog (Grand Rapids, Minnesota, United States)
Source: Front Microbiol. 2019 Apr 26;10:870. doi: 10.3389/fmicb.2019.00870 (PMC6498409; doi:10.3389/fmicb.2019.00870)
Supplement: TABLE S3 — Summary beta diversity statistics based on Bray–Curtis dissimilarity metrics. [file Table_3.XLSX]

## Sheet: Sheet1
Temperature effect of microbial community similarities at the end of incubation
ANOSIM	R	p
	0.8939	0.001
Temperature effect of microbial community beta-diversity composition
		Df	SumsOfSqs	MeanSqs	F.Model	R2	Pr(>F)
PERMANOVA	Temperature	13	13.9644	1.0742	9.6774	0.74971	0.001
	Residuals	42	4.6619	0.111	0.25029
	Total	55	18.6263	1
BETADISP	Temperature	13	0.20467	0.015744	2.3604		0.017
	Residuals	42	0.28015	0.0066702
Pairwise comparisons of the Temperature effect of microbial community beta-diversity composition at the end of incubation
Comparison	PERMANOVA			BETADISP
	R2	p	p.adj	F	p	p.adj
Preincubation:0°C	0.300151	0.038	0.0402093	0.112472	0.702	0.907507
Preincubation:4°C	0.362639	0.03	0.0399512	3.60831	0.082	0.348174
Preincubation:7°C	0.484099	0.026	0.0399512	0.00579093	0.973	0.973
Preincubation:10°C	0.489303	0.027	0.0399512	0.0605064	0.829	0.931346
Preincubation:12°C	0.595552	0.023	0.0399512	0.244581	0.662	0.907507
Preincubation:16°C	0.63299	0.028	0.0399512	0.065762	0.805	0.929582
Preincubation:20°C	0.678112	0.028	0.0399512	0.104175	0.746	0.912427
Preincubation:23°C	0.63817	0.023	0.0399512	0.0231677	0.92	0.973
Preincubation:25°C	0.761911	0.034	0.0399512	2.91684	0.136	0.412533
Preincubation:30°C	0.765583	0.027	0.0399512	3.44674	0.088	0.348174
Preincubation:33°C	0.70923	0.03	0.0399512	0.360945	0.696	0.907507
Preincubation:37°C	0.716678	0.029	0.0399512	0.601164	0.524	0.907507
Preincubation:40°C	0.706578	0.033	0.0399512	0.297442	0.62	0.907507
0°C:4°C	0.213476	0.054	0.0552135	5.62738	0.07	0.3185
0°C:7°C	0.310175	0.033	0.0399512	0.586402	0.484	0.863608
0°C:10°C	0.39649	0.033	0.0399512	1.09651	0.408	0.809109
0°C:12°C	0.532089	0.029	0.0399512	1.49294	0.208	0.5408
0°C:16°C	0.602933	0.028	0.0399512	0.986552	0.315	0.699146
0°C:20°C	0.653249	0.024	0.0399512	0.624376	0.442	0.820857
0°C:23°C	0.61681	0.027	0.0399512	0.00098579	0.94	0.973
0°C:25°C	0.741985	0.031	0.0399512	11.0291	0.028	0.171889
0°C:30°C	0.746776	0.031	0.0399512	13.7517	0.001	0.00827273
0°C:33°C	0.68506	0.032	0.0399512	2.57395	0.191	0.511206
0°C:37°C	0.680546	0.03	0.0399512	3.40323	0.136	0.412533
0°C:40°C	0.671022	0.021	0.0399512	1.01602	0.363	0.7865
4°C:7°C	0.256689	0.028	0.0399512	15.3988	0.001	0.00827273
4°C:10°C	0.325365	0.033	0.0399512	17.4777	0.034	0.171889
4°C:12°C	0.401056	0.03	0.0399512	13.0202	0.001	0.00827273
4°C:16°C	0.469532	0.03	0.0399512	14.7456	0.001	0.00827273
4°C:20°C	0.539221	0.031	0.0399512	6.48152	0.017	0.128917
4°C:23°C	0.512056	0.029	0.0399512	0.871145	0.398	0.809109
4°C:25°C	0.624355	0.024	0.0399512	39.2653	0.001	0.00827273
4°C:30°C	0.628815	0.034	0.0399512	47.5384	0.001	0.00827273
4°C:33°C	0.571655	0.02	0.0399512	21.5043	0.001	0.00827273
4°C:37°C	0.564186	0.026	0.0399512	22.7316	0.001	0.00827273
4°C:40°C	0.556691	0.031	0.0399512	6.59253	0.034	0.171889
7°C:10°C	0.267236	0.026	0.0399512	0.213372	0.672	0.907507
7°C:12°C	0.393307	0.025	0.0399512	0.628642	0.424	0.813312
7°C:16°C	0.482532	0.029	0.0399512	0.180219	0.704	0.907507
7°C:20°C	0.58666	0.036	0.0399512	0.152938	0.685	0.907507
7°C:23°C	0.568186	0.03	0.0399512	0.0463222	0.818	0.930475
7°C:25°C	0.735752	0.027	0.0399512	13.8999	0.023	0.161
7°C:30°C	0.779117	0.032	0.0399512	20.3636	0.001	0.00827273
7°C:33°C	0.711827	0.035	0.0399512	1.74348	0.226	0.555838
7°C:37°C	0.719989	0.033	0.0399512	2.7233	0.123	0.412533
7°C:40°C	0.702027	0.026	0.0399512	0.444372	0.647	0.907507
10°C:12°C	0.310278	0.056	0.0566222	0.249428	0.623	0.907507
10°C:16°C	0.397977	0.033	0.0399512	0.00161195	0.973	0.973
10°C:20°C	0.543971	0.027	0.0399512	0.0356371	0.807	0.929582
10°C:23°C	0.536401	0.035	0.0399512	0.116456	0.752	0.912427
10°C:25°C	0.708539	0.032	0.0399512	10.8084	0.034	0.171889
10°C:30°C	0.758371	0.032	0.0399512	15.8785	0.001	0.00827273
10°C:33°C	0.714329	0.022	0.0399512	0.769032	0.409	0.809109
10°C:37°C	0.716797	0.024	0.0399512	1.49784	0.238	0.569947
10°C:40°C	0.714514	0.026	0.0399512	0.245852	0.716	0.907507
12°C:16°C	0.264499	0.053	0.0548068	0.187949	0.643	0.907507
12°C:20°C	0.433906	0.026	0.0399512	0.0178995	0.854	0.947732
12°C:23°C	0.432606	0.023	0.0399512	0.243303	0.645	0.907507
12°C:25°C	0.689084	0.036	0.0399512	3.48312	0.109	0.412533
12°C:30°C	0.787501	0.03	0.0399512	4.6511	0.133	0.412533
12°C:33°C	0.726279	0.023	0.0399512	0.0105885	0.963	0.973
12°C:37°C	0.734863	0.024	0.0399512	0.1528	0.698	0.907507
12°C:40°C	0.73428	0.024	0.0399512	0.0332466	0.9	0.973
16°C:20°C	0.370375	0.028	0.0399512	0.0311241	0.91	0.973
16°C:23°C	0.360451	0.038	0.0402093	0.17836	0.722	0.907507
16°C:25°C	0.594172	0.036	0.0399512	8.33467	0.065	0.311316
16°C:30°C	0.764323	0.032	0.0399512	11.3802	0.001	0.00827273
16°C:33°C	0.71653	0.025	0.0399512	0.511328	0.389	0.809109
16°C:37°C	0.716181	0.028	0.0399512	1.08899	0.295	0.671125
16°C:40°C	0.7282	0.03	0.0399512	0.215508	0.658	0.907507
20°C:23°C	0.299694	0.072	0.072	0.126594	0.728	0.907507
20°C:25°C	0.499158	0.033	0.0399512	2.17511	0.226	0.555838
20°C:30°C	0.738332	0.035	0.0399512	3.98335	0.122	0.412533
20°C:33°C	0.705923	0.03	0.0399512	0.0776775	0.79	0.929582
20°C:37°C	0.713711	0.026	0.0399512	0.239307	0.655	0.907507
20°C:40°C	0.73172	0.028	0.0399512	0.0682233	0.807	0.929582
23°C:25°C	0.406202	0.037	0.0400833	2.08962	0.174	0.494812
23°C:30°C	0.660452	0.037	0.0400833	1.70723	0.19	0.511206
23°C:33°C	0.655336	0.032	0.0399512	0.467338	0.482	0.863608
23°C:37°C	0.669314	0.031	0.0399512	0.414482	0.536	0.907507
23°C:40°C	0.68506	0.026	0.0399512	0.290853	0.57	0.907507
25°C:30°C	0.700714	0.03	0.0399512	0.0527287	0.724	0.907507
25°C:33°C	0.742403	0.029	0.0399512	5.29889	0.119	0.412533
25°C:37°C	0.777743	0.04	0.0418391	3.96216	0.157	0.460871
25°C:40°C	0.786397	0.024	0.0399512	0.947288	0.429	0.813312
30°C:33°C	0.639927	0.03	0.0399512	8.3369	0.034	0.171889
30°C:37°C	0.710419	0.032	0.0399512	5.70399	0.088	0.348174
30°C:40°C	0.728548	0.031	0.0399512	1.35985	0.272	0.634667
33°C:37°C	0.332934	0.03	0.0399512	0.155293	0.614	0.907507
33°C:40°C	0.400462	0.029	0.0399512	0.0183852	0.877	0.96153
37°C:40°C	0.375274	0.023	0.0399512	0.000272693	0.971	0.973
