# Supplementary material for: Impact of Warming on Greenhouse Gas Production and Microbial Diversity in Anoxic Peat From a Sphagnum-Dominated Bog (Grand Rapids, Minnesota, United States)
Source: Front Microbiol. 2019 Apr 26;10:870. doi: 10.3389/fmicb.2019.00870 (PMC6498409; doi:10.3389/fmicb.2019.00870)
Supplement: TABLE S4 — Effect of incubation temperature on microbial alpha diversity. [file Table_4.XLSX]

## Sheet: Sheet1
Table S4: Effect of incubation temperature on microbial alpha diversity
Temperature (°C)	Richness (observed ASV's)		Fath's Phylogenetic diversity
	Mean	S.D	Mean	S.D
Preincubaton	116.5	44.9481	16.4672	4.17796
0	75.25	15.174	12.4785	1.83828
4	78	NA	12.8888	NA
7	56.5	8.2664	10.4489	0.91958
10	63.6667	8.73689	11.7398	2.22497
12	52.6667	4.16333	10.3915	2.55317
16	48	8.64099	8.81675	1.66431
20	37.25	3.0957	6.68213	0.330576
23	37.25	7.67572	6.42287	1.27635
25	26.75	8.57807	4.58765	1.90927
30	22.5	3.87298	4.22953	0.985443
33	23.5	12.7671	4.86597	2.55181
37	35.25	3.20156	6.72006	0.830337
40	25.75	8.65544	5.61223	1.93531
